# Supplementary material for: Modified classification of surgical meshes for hernia repair based on the analyses of 1,000 explanted meshes
Source: Springer Nature journal article supplement (doi:10.1007/s10029-012-0913-6), 2012-05-04
Supplement: MOESM1 [file 8698300]

Synthetic mesh

| Application                                              | Detailed Application | Company's                                                                                                                         | Group 1<br>Advanced technology<br>„large pores“                                         | Group 2<br>Basic technology<br>„small pores“ | Group 3-4<br>Special features, and films<br>„prevention of adhesion, modified scar<br>formation, bioactive mesh, drug release<br>etc.“ | Group 5<br>pre-shaped, preformed, 3D<br>„for in situ regeneration“                      |                                                                                                                              |
|----------------------------------------------------------|----------------------|-----------------------------------------------------------------------------------------------------------------------------------|-----------------------------------------------------------------------------------------|----------------------------------------------|----------------------------------------------------------------------------------------------------------------------------------------|-----------------------------------------------------------------------------------------|------------------------------------------------------------------------------------------------------------------------------|
| Groin                                                    | Inguinalis           | Atrium                                                                                                                            |                                                                                         | Prole & Prole Ultra Mesh                     |                                                                                                                                        | C-Qur FX Filament Coated, Pro Loop Plug                                                 |                                                                                                                              |
|                                                          |                      | B. Braun                                                                                                                          | Opilone                                                                                 | Remione                                      |                                                                                                                                        | Remione                                                                                 |                                                                                                                              |
|                                                          |                      | C.R.Bard                                                                                                                          | Bard SoftMesh                                                                           | Bard Flatmesh, Bard Preshape                 |                                                                                                                                        | Bard Perix Plug, Bard Perix Light Plug, Polysoft                                        | Bard 3D Max, Bard 3D Max Light                                                                                               |
|                                                          |                      | Cook                                                                                                                              |                                                                                         |                                              |                                                                                                                                        |                                                                                         |                                                                                                                              |
|                                                          |                      | Covidien                                                                                                                          | Paristex™ - Paristex™ Light - Paristex™ Type C - Paristex™ type T - Paristex™ Mono      | Surgipro™                                    |                                                                                                                                        | Paristex™ Progrip - Paristex™ Progrip                                                   | Burgipro™ Hernia Mesh Plug - Paristex™ Progrip PlugPatch - Paristex™ Preshaped & Folding meshes - Paristex™ Progrip Anatomic |
|                                                          |                      | DynaMesh                                                                                                                          | DynaMesh Laminated, DynaMesh Endlap, DynaMesh-PP Light, DynaMesh-PP Standard            |                                              |                                                                                                                                        |                                                                                         | DynaMesh Lichtonlan                                                                                                          |
|                                                          |                      | Ethicon                                                                                                                           | Mersilene                                                                               | Polene                                       |                                                                                                                                        | Ultrapro, Proceed, PhysioMesh, VYPRD 11                                                 | PVP, UHS, UPP, 3DP                                                                                                           |
|                                                          |                      | Gore                                                                                                                              |                                                                                         | Intello                                      |                                                                                                                                        |                                                                                         |                                                                                                                              |
|                                                          |                      | KCI                                                                                                                               |                                                                                         |                                              |                                                                                                                                        |                                                                                         |                                                                                                                              |
|                                                          |                      | PPM medical                                                                                                                       | TIMESH extralight, light, strong / TPA/TCH / TPLUG System / TLENE Plug / TLENE Plug Set |                                              |                                                                                                                                        | TIMESH extralight, light, strong / TPA/TCH / TPLUG System / TLENE Plug / TLENE Plug Set |                                                                                                                              |
|                                                          |                      | Serag Wiesener                                                                                                                    | SeraMesh XD                                                                             | SeraMesh SO                                  |                                                                                                                                        |                                                                                         |                                                                                                                              |
|                                                          |                      | Tutogen                                                                                                                           |                                                                                         |                                              |                                                                                                                                        |                                                                                         |                                                                                                                              |
|                                                          | Femorals             | Atrium                                                                                                                            |                                                                                         |                                              | Prole & Prole Ultra Mesh                                                                                                               |                                                                                         | C-Qur FX Filament Coated, Pro Loop Plug                                                                                      |
|                                                          |                      | B. Braun                                                                                                                          | Opilone                                                                                 | Remione                                      |                                                                                                                                        |                                                                                         |                                                                                                                              |
|                                                          |                      | C.R.Bard                                                                                                                          | Bard SoftMesh                                                                           | Bard Flatmesh, Bard Preshape                 |                                                                                                                                        | Bard Perix Plug, Bard Perix Light Plug, Polysoft                                        | Bard 3D Max, Bard 3D Max Light                                                                                               |
|                                                          |                      | Cook                                                                                                                              |                                                                                         |                                              |                                                                                                                                        |                                                                                         |                                                                                                                              |
|                                                          |                      | Covidien                                                                                                                          | Paristex™ - Paristex™ Light - Paristex™ Type C - Paristex™ type T - Paristex™ Mono      | Surgipro™                                    |                                                                                                                                        | Paristex™ Progrip - Paristex™ Progrip                                                   | Burgipro™ Hernia Mesh Plug - Paristex™ Progrip PlugPatch - Paristex™ Preshaped & Folding meshes - Paristex™ Progrip Anatomic |
|                                                          |                      | DynaMesh                                                                                                                          | DynaMesh Endlap, DynaMesh-PP Light, DynaMesh-PP Standard                                |                                              |                                                                                                                                        |                                                                                         |                                                                                                                              |
|                                                          |                      | Ethicon                                                                                                                           | Mersilene                                                                               | Polene                                       |                                                                                                                                        | Ultrapro, UPP, UHS, Proceed, PhysioMesh, VYPRD 11                                       | PVP, UHS, UPP, 3DP                                                                                                           |
|                                                          |                      | Gore                                                                                                                              |                                                                                         | Intello                                      |                                                                                                                                        |                                                                                         |                                                                                                                              |
|                                                          |                      | KCI                                                                                                                               |                                                                                         |                                              |                                                                                                                                        |                                                                                         |                                                                                                                              |
|                                                          |                      | PPM medical                                                                                                                       | TIMESH extralight, light, strong / TPA/TCH / TPLUG System / TLENE Plug / TLENE Plug Set |                                              |                                                                                                                                        | TIMESH extralight, light, strong / TPA/TCH / TPLUG System / TLENE Plug / TLENE Plug Set |                                                                                                                              |
|                                                          |                      | Serag Wiesener                                                                                                                    | SeraMesh XD                                                                             | SeraMesh SO                                  |                                                                                                                                        |                                                                                         |                                                                                                                              |
|                                                          |                      | Tutogen                                                                                                                           |                                                                                         |                                              |                                                                                                                                        |                                                                                         |                                                                                                                              |
| Ventral                                                  | Parastomal           | Atrium                                                                                                                            |                                                                                         | ATRLUM Prole&Prole Ultra Mesh                |                                                                                                                                        | ATRLUM C-Qur FX Filament coated, C-Qur                                                  |                                                                                                                              |
|                                                          |                      | B. Braun                                                                                                                          | Opilone                                                                                 | Remione                                      |                                                                                                                                        | Omira                                                                                   |                                                                                                                              |
|                                                          |                      | C.R.Bard                                                                                                                          |                                                                                         | Bard Parastomal Patch                        |                                                                                                                                        |                                                                                         |                                                                                                                              |
|                                                          |                      | Cook                                                                                                                              |                                                                                         |                                              |                                                                                                                                        |                                                                                         |                                                                                                                              |
|                                                          |                      | Covidien                                                                                                                          | Paristex™ - Paristex™ Light - Paristex™ Type C - Paristex™ type T - Paristex™ Mono      | Surgipro™                                    |                                                                                                                                        | Paristex™ Composite Parastomal                                                          |                                                                                                                              |
|                                                          |                      | DynaMesh                                                                                                                          | DynaMesh-PP Light, DynaMesh-PP Standard                                                 |                                              |                                                                                                                                        |                                                                                         | DynaMesh-PST                                                                                                                 |
|                                                          |                      | Ethicon                                                                                                                           | Mersilene                                                                               | Polene                                       |                                                                                                                                        | Ultrapro, Proceed, PhysioMesh, VYPRD 11                                                 |                                                                                                                              |
|                                                          |                      | Gore                                                                                                                              |                                                                                         |                                              |                                                                                                                                        |                                                                                         |                                                                                                                              |
|                                                          |                      | KCI                                                                                                                               |                                                                                         |                                              |                                                                                                                                        |                                                                                         |                                                                                                                              |
|                                                          |                      | PPM medical                                                                                                                       | TIMESH light, strong / TLENE Guard / TLENE Guard Set                                    |                                              |                                                                                                                                        | TIMESH light, strong / TLENE Guard / TLENE Guard Set                                    |                                                                                                                              |
|                                                          |                      | Serag Wiesener                                                                                                                    |                                                                                         |                                              |                                                                                                                                        |                                                                                         |                                                                                                                              |
|                                                          |                      | Tutogen                                                                                                                           |                                                                                         |                                              |                                                                                                                                        |                                                                                         |                                                                                                                              |
|                                                          | Ambilicaris          | Atrium                                                                                                                            |                                                                                         | ATRLUM Prole&Prole Ultra Mesh                |                                                                                                                                        | ATRLUM C-Qur FX Filament Coated, C-Qur V Patch, C-Qur                                   |                                                                                                                              |
|                                                          |                      | B. Braun                                                                                                                          | Opilone                                                                                 | Remione                                      |                                                                                                                                        | Omira                                                                                   |                                                                                                                              |
|                                                          |                      | C.R.Bard                                                                                                                          |                                                                                         | Bard Ventralis                               |                                                                                                                                        |                                                                                         |                                                                                                                              |
|                                                          |                      | Cook                                                                                                                              |                                                                                         |                                              |                                                                                                                                        |                                                                                         |                                                                                                                              |
|                                                          |                      | Covidien                                                                                                                          | Paristex™ - Paristex™ Light - Paristex™ Type C - Paristex™ type T - Paristex™ Mono      | Surgipro™                                    |                                                                                                                                        | Paristex™ Progrip - Paristex™ Progrip                                                   | Paristex™ Umbilical patch                                                                                                    |
|                                                          |                      | DynaMesh                                                                                                                          | DynaMesh-CCAT, DynaMesh-PP Light, DynaMesh-PP Standard                                  |                                              |                                                                                                                                        | DynaMesh-IPCM                                                                           |                                                                                                                              |
|                                                          |                      | Ethicon                                                                                                                           | Mersilene                                                                               | Polene                                       |                                                                                                                                        | Ultrapro, Proceed, PhysioMesh, VYPRD 11                                                 | PVP, UHS                                                                                                                     |
|                                                          |                      | Gore                                                                                                                              |                                                                                         |                                              |                                                                                                                                        | QuaMesh                                                                                 |                                                                                                                              |
|                                                          |                      | KCI                                                                                                                               |                                                                                         |                                              |                                                                                                                                        |                                                                                         |                                                                                                                              |
|                                                          |                      | PPM medical                                                                                                                       | TIMESH light, strong / TLENE Plug / TLENE Plug Set                                      |                                              |                                                                                                                                        | TIMESH light, strong / TLENE Plug / TLENE Plug Set                                      |                                                                                                                              |
|                                                          |                      | Serag Wiesener                                                                                                                    |                                                                                         |                                              |                                                                                                                                        |                                                                                         |                                                                                                                              |
|                                                          |                      | Tutogen                                                                                                                           |                                                                                         |                                              |                                                                                                                                        |                                                                                         |                                                                                                                              |
| Epigastrica                                              | Atrium               |                                                                                                                                   | ATRLUM Prole&Prole Ultra Mesh                                                           |                                              | ATRLUM C-Qur FX Filament Coated                                                                                                        |                                                                                         |                                                                                                                              |
|                                                          | B. Braun             | Opilone                                                                                                                           | Remione                                                                                 |                                              |                                                                                                                                        |                                                                                         |                                                                                                                              |
|                                                          | C.R.Bard             |                                                                                                                                   |                                                                                         |                                              |                                                                                                                                        |                                                                                         |                                                                                                                              |
|                                                          | Cook                 |                                                                                                                                   |                                                                                         |                                              |                                                                                                                                        |                                                                                         |                                                                                                                              |
|                                                          | Covidien             | Paristex™ - Paristex™ Light - Paristex™ Type C - Paristex™ type T - Paristex™ Mono                                                | Surgipro™                                                                               |                                              | Paristex™ Progrip - Paristex™ Progrip                                                                                                  |                                                                                         |                                                                                                                              |
|                                                          | DynaMesh             | DynaMesh-CCAT, DynaMesh-PP Light, DynaMesh-PP Standard                                                                            |                                                                                         |                                              |                                                                                                                                        |                                                                                         |                                                                                                                              |
|                                                          | Ethicon              | Mersilene                                                                                                                         | Polene                                                                                  |                                              | Ultrapro, Proceed, PhysioMesh, VYPRD 11                                                                                                | PVP, UHS                                                                                |                                                                                                                              |
|                                                          | Gore                 |                                                                                                                                   |                                                                                         |                                              |                                                                                                                                        |                                                                                         |                                                                                                                              |
|                                                          | KCI                  |                                                                                                                                   |                                                                                         |                                              |                                                                                                                                        |                                                                                         |                                                                                                                              |
|                                                          | PPM medical          | TIMESH light, strong                                                                                                              |                                                                                         |                                              | TIMESH light, strong                                                                                                                   |                                                                                         |                                                                                                                              |
|                                                          | Serag Wiesener       |                                                                                                                                   |                                                                                         |                                              |                                                                                                                                        |                                                                                         |                                                                                                                              |
|                                                          | Tutogen              |                                                                                                                                   |                                                                                         |                                              |                                                                                                                                        |                                                                                         |                                                                                                                              |
| Highinguinalis                                           | Atrium               |                                                                                                                                   | ATRLUM Prole&Prole Ultra Mesh                                                           |                                              | ATRLUM C-Qur FX Filament Coated, C-Qur                                                                                                 |                                                                                         |                                                                                                                              |
|                                                          | B. Braun             | Opilone                                                                                                                           | Remione                                                                                 |                                              | Omira                                                                                                                                  |                                                                                         |                                                                                                                              |
|                                                          | C.R.Bard             |                                                                                                                                   | Bard Curasoft Patch                                                                     |                                              |                                                                                                                                        |                                                                                         |                                                                                                                              |
|                                                          | Cook                 |                                                                                                                                   |                                                                                         |                                              |                                                                                                                                        |                                                                                         |                                                                                                                              |
|                                                          | Covidien             | Paristex™ Composite - Paristex™ Composite                                                                                         |                                                                                         |                                              | Paristex™ Composite - Paristex™ Composite                                                                                              |                                                                                         |                                                                                                                              |
|                                                          | DynaMesh             |                                                                                                                                   |                                                                                         |                                              |                                                                                                                                        |                                                                                         |                                                                                                                              |
|                                                          | Ethicon              | Mersilene                                                                                                                         | Polene                                                                                  |                                              | Ultrapro, Proceed, PhysioMesh, VYPRD 11                                                                                                | PVP, UHS                                                                                |                                                                                                                              |
|                                                          | Gore                 |                                                                                                                                   |                                                                                         |                                              |                                                                                                                                        |                                                                                         |                                                                                                                              |
|                                                          | KCI                  |                                                                                                                                   |                                                                                         |                                              |                                                                                                                                        |                                                                                         |                                                                                                                              |
|                                                          | PPM medical          | TIMESH light, strong / TSURE                                                                                                      |                                                                                         |                                              | TIMESH light, strong / TSURE                                                                                                           |                                                                                         |                                                                                                                              |
|                                                          | Serag Wiesener       |                                                                                                                                   |                                                                                         |                                              |                                                                                                                                        |                                                                                         |                                                                                                                              |
|                                                          | Tutogen              |                                                                                                                                   |                                                                                         |                                              |                                                                                                                                        |                                                                                         |                                                                                                                              |
| Nabelhernie                                              | Atrium               |                                                                                                                                   | ATRLUM Prole&Prole Ultra Mesh                                                           |                                              | ATRLUM C-Qur, ATRUM C-Quire TacShield, V Patch                                                                                         |                                                                                         |                                                                                                                              |
|                                                          | B. Braun             | Opilone                                                                                                                           | Remione                                                                                 |                                              | Omira                                                                                                                                  |                                                                                         |                                                                                                                              |
|                                                          | C.R.Bard             | Bard SoftMesh                                                                                                                     | Bard Flatmesh                                                                           |                                              | Bard Ventrio, Bard Compose LIP, Bard Compose Kugel, Bard                                                                               |                                                                                         |                                                                                                                              |
|                                                          | Cook                 |                                                                                                                                   |                                                                                         |                                              |                                                                                                                                        |                                                                                         |                                                                                                                              |
|                                                          | Covidien             | Paristex™ Light X Shaped - Paristex™ - Paristex™ Light - Paristex™ Type C - Paristex™ type T - Paristex™ Mono                     | Surgipro™                                                                               |                                              | Paristex™ Progrip - Paristex™ Progrip                                                                                                  |                                                                                         |                                                                                                                              |
|                                                          | DynaMesh             | DynaMesh-CCAT, DynaMesh-PP Light, DynaMesh-PP Standard                                                                            |                                                                                         |                                              |                                                                                                                                        |                                                                                         |                                                                                                                              |
|                                                          | Ethicon              | Mersilene                                                                                                                         | Polene                                                                                  |                                              | Ultrapro, Proceed, PhysioMesh, VYPRD 11                                                                                                | PVP, UHS                                                                                |                                                                                                                              |
|                                                          | Gore                 |                                                                                                                                   |                                                                                         |                                              |                                                                                                                                        |                                                                                         |                                                                                                                              |
|                                                          | KCI                  |                                                                                                                                   |                                                                                         |                                              |                                                                                                                                        |                                                                                         |                                                                                                                              |
|                                                          | PPM medical          | TIMESH light, strong / TLENE Strip                                                                                                |                                                                                         |                                              | TIMESH light, strong / TLENE Strip                                                                                                     |                                                                                         |                                                                                                                              |
|                                                          | Serag Wiesener       |                                                                                                                                   |                                                                                         |                                              |                                                                                                                                        |                                                                                         |                                                                                                                              |
|                                                          | Tutogen              |                                                                                                                                   |                                                                                         |                                              |                                                                                                                                        |                                                                                         |                                                                                                                              |
| Abdominal                                                | Atrium               |                                                                                                                                   | ATRLUM Prole&Prole Ultra Mesh                                                           |                                              | ATRLUM C-Qur FX Filament Coated, C-QUIP TacShield, C-Qur                                                                               |                                                                                         |                                                                                                                              |
|                                                          | B. Braun             | Opilone                                                                                                                           | Remione                                                                                 |                                              | Omira                                                                                                                                  |                                                                                         |                                                                                                                              |
|                                                          | C.R.Bard             | Bard SoftMesh                                                                                                                     | Bard Flatmesh                                                                           |                                              | Bard Ventrio, Bard Compose LIP, Bard Compose Kugel, Bard                                                                               |                                                                                         |                                                                                                                              |
|                                                          | Cook                 |                                                                                                                                   |                                                                                         |                                              |                                                                                                                                        |                                                                                         |                                                                                                                              |
|                                                          | Covidien             | Paristex™ Light X Shaped - Paristex™ - Paristex™ Light - Paristex™ Type C - Paristex™ type T - Paristex™ Mono                     | Surgipro™                                                                               |                                              | Paristex™ Progrip - Paristex™ Progrip                                                                                                  |                                                                                         |                                                                                                                              |
|                                                          | DynaMesh             | DynaMesh-CCAT, DynaMesh-PP Light, DynaMesh-PP Standard                                                                            |                                                                                         |                                              |                                                                                                                                        |                                                                                         |                                                                                                                              |
|                                                          | Ethicon              | Mersilene                                                                                                                         | Polene                                                                                  |                                              | Ultrapro, Proceed, PhysioMesh, VYPRD 11                                                                                                | PVP, UHS                                                                                |                                                                                                                              |
|                                                          | Gore                 |                                                                                                                                   |                                                                                         |                                              |                                                                                                                                        |                                                                                         |                                                                                                                              |
|                                                          | KCI                  |                                                                                                                                   |                                                                                         |                                              |                                                                                                                                        |                                                                                         |                                                                                                                              |
|                                                          | PPM medical          | TIMESH light, strong / TLENE Strip                                                                                                |                                                                                         |                                              | TIMESH light, strong / TLENE Strip                                                                                                     |                                                                                         |                                                                                                                              |
|                                                          | Serag Wiesener       |                                                                                                                                   |                                                                                         |                                              |                                                                                                                                        |                                                                                         |                                                                                                                              |
|                                                          | Tutogen              |                                                                                                                                   |                                                                                         |                                              |                                                                                                                                        |                                                                                         |                                                                                                                              |
| kongenitale Bauchwanddefekte (Omphalocele, Spinaerectia) | Atrium               |                                                                                                                                   | ATRLUM Prole&Prole Ultra Mesh                                                           |                                              | ATRLUM C-Qur FX Filament Coated, C-Qur, TacShield                                                                                      |                                                                                         |                                                                                                                              |
|                                                          | B. Braun             |                                                                                                                                   |                                                                                         |                                              |                                                                                                                                        |                                                                                         |                                                                                                                              |
|                                                          | C.R.Bard             |                                                                                                                                   |                                                                                         |                                              |                                                                                                                                        |                                                                                         |                                                                                                                              |
|                                                          | Cook                 |                                                                                                                                   |                                                                                         |                                              |                                                                                                                                        |                                                                                         |                                                                                                                              |
|                                                          | Covidien             |                                                                                                                                   |                                                                                         |                                              |                                                                                                                                        |                                                                                         |                                                                                                                              |
|                                                          | DynaMesh             |                                                                                                                                   |                                                                                         |                                              |                                                                                                                                        |                                                                                         |                                                                                                                              |
|                                                          | Ethicon              |                                                                                                                                   |                                                                                         |                                              | HY SOMESH PROCEED                                                                                                                      | PVP                                                                                     |                                                                                                                              |
|                                                          | Gore                 |                                                                                                                                   |                                                                                         |                                              |                                                                                                                                        |                                                                                         |                                                                                                                              |
|                                                          | KCI                  |                                                                                                                                   |                                                                                         |                                              |                                                                                                                                        |                                                                                         |                                                                                                                              |
|                                                          | PPM medical          |                                                                                                                                   |                                                                                         |                                              |                                                                                                                                        |                                                                                         |                                                                                                                              |
|                                                          | Serag Wiesener       |                                                                                                                                   |                                                                                         |                                              |                                                                                                                                        |                                                                                         |                                                                                                                              |
|                                                          | Tutogen              |                                                                                                                                   |                                                                                         |                                              |                                                                                                                                        |                                                                                         |                                                                                                                              |
| Intraepitoneal                                           | Atrium               |                                                                                                                                   | ATRLUM Prole&Prole Ultra Mesh                                                           |                                              | TacShield, C-Qur, V Patch                                                                                                              |                                                                                         |                                                                                                                              |
|                                                          | B. Braun             |                                                                                                                                   |                                                                                         |                                              |                                                                                                                                        |                                                                                         |                                                                                                                              |
|                                                          | C.R.Bard             |                                                                                                                                   |                                                                                         |                                              |                                                                                                                                        |                                                                                         |                                                                                                                              |
|                                                          | Cook                 |                                                                                                                                   |                                                                                         |                                              |                                                                                                                                        |                                                                                         |                                                                                                                              |
|                                                          | Covidien             | Paristex™ Composite - Paristex™ Composite - Paristex™ Composite Open skirt                                                        |                                                                                         |                                              | Paristex™ Composite - Paristex™ Composite - Paristex™ Composite Open skirt                                                             |                                                                                         |                                                                                                                              |
|                                                          | DynaMesh             |                                                                                                                                   |                                                                                         |                                              | DynaMesh-IPCM                                                                                                                          | DynaMesh-PST                                                                            |                                                                                                                              |
|                                                          | Ethicon              |                                                                                                                                   |                                                                                         |                                              |                                                                                                                                        |                                                                                         |                                                                                                                              |
|                                                          | Gore                 |                                                                                                                                   |                                                                                         |                                              |                                                                                                                                        |                                                                                         |                                                                                                                              |
|                                                          | KCI                  |                                                                                                                                   |                                                                                         |                                              |                                                                                                                                        |                                                                                         |                                                                                                                              |
|                                                          | PPM medical          | TIMESH light, strong / TPA/TCH / TPLUG System / TLENE Plug / TLENE Plug Set / TSURE / TLENE Guard / TLENE Guard Set / TLENE Strip |                                                                                         |                                              | TIMESH light, strong / TPA/TCH / TPLUG System / TLENE Plug / TLENE Plug Set / TSURE / TLENE Guard / TLENE Guard Set / TLENE Strip      |                                                                                         |                                                                                                                              |
|                                                          | Serag Wiesener       |                                                                                                                                   |                                                                                         |                                              |                                                                                                                                        |                                                                                         |                                                                                                                              |
|                                                          | Tutogen              |                                                                                                                                   |                                                                                         |                                              |                                                                                                                                        |                                                                                         |                                                                                                                              |

Biological devices

| Application                                                       | Detailed Application | Company's         | xenografts        |                      |                                                  | allografts  |                 |                  |
|-------------------------------------------------------------------|----------------------|-------------------|-------------------|----------------------|--------------------------------------------------|-------------|-----------------|------------------|
|                                                                   |                      |                   | crosslinked       | non crosslinked      | special features                                 | crosslinked | non crosslinked | special features |
| Groin                                                             | Inguinalis           | Atrium            |                   |                      |                                                  |             |                 |                  |
|                                                                   |                      | B.Braun           |                   |                      |                                                  |             |                 |                  |
|                                                                   |                      | C.R.Bard          | Baro Collamend FM |                      | Baro Collamend FM                                |             |                 |                  |
|                                                                   |                      | Cook              |                   | BOCESIGN             |                                                  |             |                 |                  |
|                                                                   |                      | Covidien          | PERMACOL          |                      |                                                  |             |                 |                  |
|                                                                   |                      | DynaMesh          |                   |                      |                                                  |             |                 |                  |
|                                                                   |                      | Ethicon           |                   |                      |                                                  |             |                 |                  |
|                                                                   |                      | Gore              |                   |                      |                                                  |             |                 |                  |
|                                                                   |                      | KCI               |                   |                      | STRATICE                                         |             |                 |                  |
|                                                                   |                      | PFM medical       |                   |                      |                                                  |             |                 |                  |
|                                                                   |                      | Serag Wiesener    |                   |                      |                                                  |             |                 |                  |
|                                                                   |                      | Tutogen           |                   |                      | Tutomesh                                         |             |                 |                  |
|                                                                   | Femorals             | Atrium            |                   |                      |                                                  |             |                 |                  |
|                                                                   |                      | B.Braun           |                   |                      |                                                  |             |                 |                  |
|                                                                   |                      | C.R.Bard          | Baro Collamend FM |                      | Baro Collamend FM                                |             |                 |                  |
|                                                                   |                      | Cook              |                   | BOCESIGN             |                                                  |             |                 |                  |
|                                                                   |                      | Covidien          | PERMACOL          |                      |                                                  |             |                 |                  |
|                                                                   |                      | DynaMesh          |                   |                      |                                                  |             |                 |                  |
|                                                                   |                      | Ethicon           |                   |                      |                                                  |             |                 |                  |
|                                                                   |                      | Gore              |                   |                      |                                                  |             |                 |                  |
|                                                                   |                      | KCI               |                   |                      | STRATICE                                         |             |                 |                  |
|                                                                   |                      | PFM medical       |                   |                      |                                                  |             |                 |                  |
|                                                                   |                      | Serag Wiesener    |                   |                      |                                                  |             |                 |                  |
|                                                                   |                      | Tutogen           |                   |                      | Tutomesh                                         |             |                 |                  |
| Ventral                                                           | Parasomal            | Atrium            |                   |                      |                                                  |             |                 |                  |
|                                                                   |                      | B.Braun           |                   |                      |                                                  |             |                 |                  |
|                                                                   |                      | C.R.Bard          | Baro Collamend FM |                      | Baro Collamend FM                                |             |                 |                  |
|                                                                   |                      | Cook              |                   | BOCESIGN             |                                                  |             |                 |                  |
|                                                                   |                      | Covidien          | PERMACOL          |                      |                                                  |             |                 |                  |
|                                                                   |                      | DynaMesh          |                   |                      |                                                  |             |                 |                  |
|                                                                   |                      | Ethicon           |                   |                      |                                                  |             |                 |                  |
|                                                                   |                      | Gore              |                   |                      |                                                  |             |                 |                  |
|                                                                   |                      | KCI               |                   |                      | STRATICE                                         |             |                 |                  |
|                                                                   |                      | PFM medical       |                   |                      |                                                  |             |                 |                  |
|                                                                   |                      | Serag Wiesener    |                   |                      |                                                  |             |                 |                  |
|                                                                   |                      | Tutogen           |                   |                      | Tutomesh                                         |             |                 |                  |
|                                                                   | Umbilicalis          | Atrium            |                   |                      |                                                  |             |                 |                  |
|                                                                   |                      | B.Braun           |                   |                      |                                                  |             |                 |                  |
|                                                                   |                      | C.R.Bard          | Baro Collamend FM |                      | Baro Collamend FM                                |             |                 |                  |
|                                                                   |                      | Cook              |                   | BOCESIGN             |                                                  |             |                 |                  |
|                                                                   |                      | Covidien          | PERMACOL          |                      |                                                  |             |                 |                  |
|                                                                   |                      | Ethicon           |                   |                      |                                                  |             |                 |                  |
|                                                                   |                      | Gore              |                   |                      |                                                  |             |                 |                  |
|                                                                   |                      | KCI               |                   |                      | STRATICE                                         |             |                 |                  |
|                                                                   |                      | PFM medical       |                   |                      |                                                  |             |                 |                  |
|                                                                   |                      | Serag Wiesener    |                   |                      |                                                  |             |                 |                  |
|                                                                   |                      | Tutogen           |                   |                      | Tutomesh                                         |             |                 |                  |
|                                                                   |                      | Epigastrica       | Atrium            |                      |                                                  |             |                 |                  |
| B.Braun                                                           |                      |                   |                   |                      |                                                  |             |                 |                  |
| C.R.Bard                                                          | Baro Collamend FM    |                   |                   | Baro Collamend FM    |                                                  |             |                 |                  |
| Cook                                                              |                      |                   | BOCESIGN          |                      |                                                  |             |                 |                  |
| Covidien                                                          | PERMACOL             |                   |                   |                      |                                                  |             |                 |                  |
| DynaMesh                                                          |                      |                   |                   |                      |                                                  |             |                 |                  |
| Ethicon                                                           |                      |                   |                   |                      |                                                  |             |                 |                  |
| Gore                                                              |                      |                   |                   |                      |                                                  |             |                 |                  |
| KCI                                                               |                      |                   |                   | STRATICE             |                                                  |             |                 |                  |
| PFM medical                                                       |                      |                   |                   |                      |                                                  |             |                 |                  |
| Serag Wiesener                                                    |                      |                   |                   |                      |                                                  |             |                 |                  |
| Tutogen                                                           |                      |                   |                   | Tutomesh             |                                                  |             |                 |                  |
| Diaphragmatica                                                    | Atrium               |                   |                   |                      |                                                  |             |                 |                  |
|                                                                   | B.Braun              |                   |                   |                      |                                                  |             |                 |                  |
|                                                                   | C.R.Bard             | Baro Collamend FM |                   | Baro Collamend FM    |                                                  |             |                 |                  |
|                                                                   | Cook                 |                   | BOCESIGN          |                      |                                                  |             |                 |                  |
|                                                                   | Covidien             | PERMACOL          |                   |                      |                                                  |             |                 |                  |
|                                                                   | DynaMesh             |                   |                   |                      |                                                  |             |                 |                  |
|                                                                   | Ethicon              |                   |                   |                      |                                                  |             |                 |                  |
|                                                                   | Gore                 |                   |                   |                      |                                                  |             |                 |                  |
|                                                                   | KCI                  |                   |                   | STRATICE             |                                                  |             |                 |                  |
|                                                                   | PFM medical          |                   |                   |                      |                                                  |             |                 |                  |
|                                                                   | Serag Wiesener       |                   |                   |                      |                                                  |             |                 |                  |
|                                                                   | Tutogen              |                   |                   | Tutomesh             |                                                  |             |                 |                  |
| Nabelhernie                                                       | Atrium               |                   |                   |                      |                                                  |             |                 |                  |
|                                                                   | B.Braun              |                   |                   |                      |                                                  |             |                 |                  |
|                                                                   | C.R.Bard             | Baro Collamend FM |                   | Baro Collamend FM    |                                                  |             |                 |                  |
|                                                                   | Cook                 |                   | BOCESIGN          |                      |                                                  |             |                 |                  |
|                                                                   | Covidien             | PERMACOL          |                   |                      |                                                  |             |                 |                  |
|                                                                   | DynaMesh             |                   |                   |                      |                                                  |             |                 |                  |
|                                                                   | Ethicon              |                   |                   |                      |                                                  |             |                 |                  |
|                                                                   | Gore                 |                   |                   |                      |                                                  |             |                 |                  |
|                                                                   | KCI                  |                   |                   | STRATICE             |                                                  |             |                 |                  |
|                                                                   | PFM medical          |                   |                   |                      |                                                  |             |                 |                  |
|                                                                   | Serag Wiesener       |                   |                   |                      |                                                  |             |                 |                  |
|                                                                   | Tutogen              |                   |                   | Tutomesh             |                                                  |             |                 |                  |
| Abdominal                                                         | Atrium               |                   |                   |                      |                                                  |             |                 |                  |
|                                                                   | B.Braun              |                   |                   |                      |                                                  |             |                 |                  |
|                                                                   | C.R.Bard             | Baro Collamend FM |                   | Baro Collamend FM    |                                                  |             |                 |                  |
|                                                                   | Cook                 |                   | BOCESIGN          | mit VAC kombinierbar |                                                  |             |                 |                  |
|                                                                   | Covidien             | PERMACOL          |                   |                      |                                                  |             |                 |                  |
|                                                                   | DynaMesh             |                   |                   |                      |                                                  |             |                 |                  |
|                                                                   | Ethicon              |                   |                   |                      |                                                  |             |                 |                  |
|                                                                   | Gore                 |                   |                   |                      |                                                  |             |                 |                  |
|                                                                   | KCI                  |                   |                   | STRATICE             |                                                  |             |                 |                  |
|                                                                   | PFM medical          |                   |                   |                      |                                                  |             |                 |                  |
|                                                                   | Serag Wiesener       |                   |                   |                      |                                                  |             |                 |                  |
|                                                                   | Tutogen              |                   |                   | Tutomesh             | Tutogen Tutomesh in Kombination mit VAC möglich. |             |                 |                  |
| Lungenhilfe<br>Bauchwanddefekte<br>(Omphalocele,<br>Laparochisis) | Atrium               |                   |                   |                      |                                                  |             |                 |                  |
|                                                                   | B.Braun              |                   |                   |                      |                                                  |             |                 |                  |
|                                                                   | C.R.Bard             | Baro Collamend FM |                   | Baro Collamend FM    |                                                  |             |                 |                  |
|                                                                   | Cook                 |                   | BOCESIGN          |                      |                                                  |             |                 |                  |
|                                                                   | Covidien             | PERMACOL          |                   |                      |                                                  |             |                 |                  |
|                                                                   | DynaMesh             |                   |                   |                      |                                                  |             |                 |                  |
|                                                                   | Ethicon              |                   |                   |                      |                                                  |             |                 |                  |
|                                                                   | Gore                 |                   |                   |                      |                                                  |             |                 |                  |
|                                                                   | KCI                  |                   |                   | STRATICE             |                                                  |             |                 |                  |
|                                                                   | PFM medical          |                   |                   |                      |                                                  |             |                 |                  |
|                                                                   | Serag Wiesener       |                   |                   |                      |                                                  |             |                 |                  |
|                                                                   | Tutogen              |                   |                   | Tutomesh             |                                                  |             |                 |                  |
| Intraabdominal                                                    | Atrium               |                   |                   |                      |                                                  |             |                 |                  |
|                                                                   | B.Braun              |                   |                   |                      |                                                  |             |                 |                  |
|                                                                   | C.R.Bard             | Baro Collamend FM |                   | Baro Collamend FM    |                                                  |             |                 |                  |
|                                                                   | Cook                 |                   | BOCESIGN          |                      |                                                  |             |                 |                  |
|                                                                   | Covidien             | PERMACOL          |                   |                      |                                                  |             |                 |                  |
|                                                                   | DynaMesh             |                   |                   |                      |                                                  |             |                 |                  |
|                                                                   | Ethicon              |                   |                   |                      |                                                  |             |                 |                  |
|                                                                   | Gore                 |                   |                   |                      |                                                  |             |                 |                  |
|                                                                   | KCI                  |                   |                   | STRATICE             |                                                  |             |                 |                  |
|                                                                   | PFM medical          |                   |                   |                      |                                                  |             |                 |                  |
|                                                                   | Serag Wiesener       |                   |                   |                      |                                                  |             |                 |                  |
|                                                                   | Tutogen              |                   |                   | Tutomesh             |                                                  |             |                 |                  |
